# Supplementary material for: Senescence plays a role in myotonic dystrophy type 1
Source: PubMed Central journal article supplement (PMC9675450; doi:10.1172/jci.insight.159357), 2022-10-10
Supplement: jciinsight-7-159357-s109.pdf [file jciinsight-7-159357-s109.pdf]

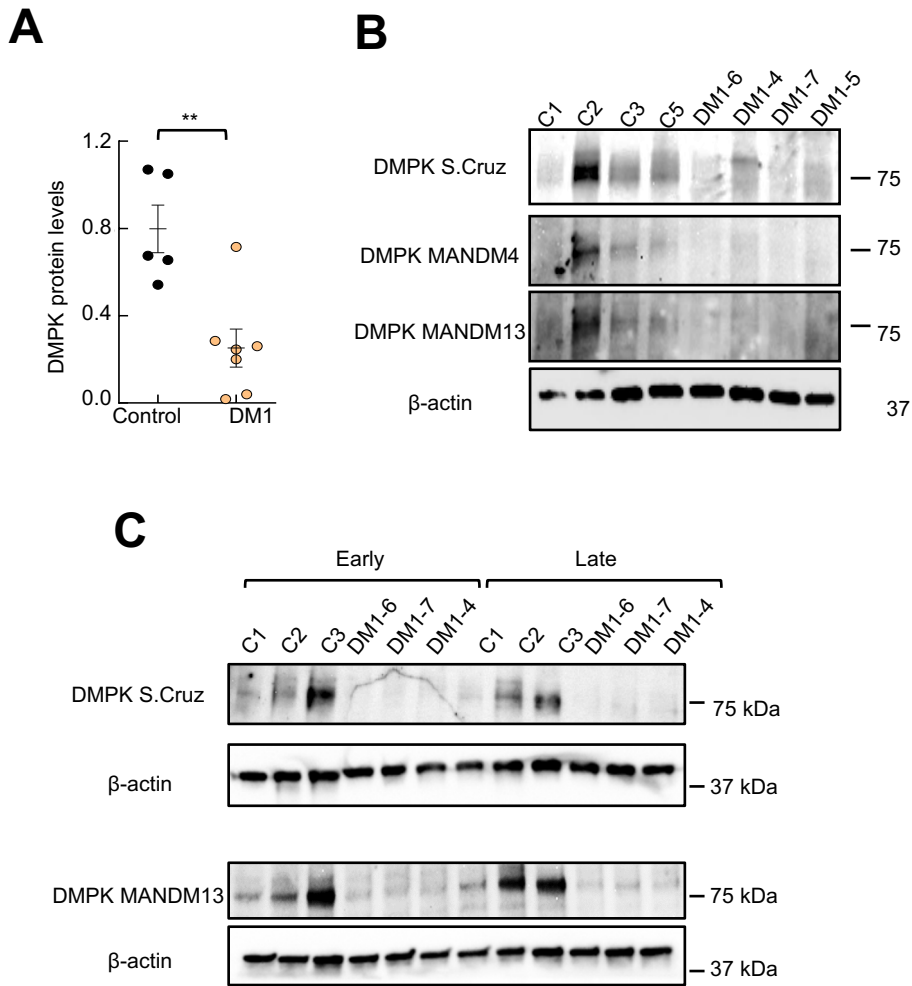

**Figure 1. Expression of DMPK in fibroblasts derived from DM1 individuals.**

**A)** Quantification of DMPK protein levels, stained with Santa Cruz Antibody, in fibroblasts derived from DM1 patients and controls (each point represents one independent sample). **B)** Representative Immunoblot of DMPK protein levels in fibroblasts derived from DM1 patients and controls stained with the indicated antibodies **C)** Representative Immunoblot of DMPK protein levels in fibroblasts derived from DM1 patients and controls at early (between 0-10) and late (between 35-40) passage stained with the indicated antibodies.

- Control
- DM1 without cancer
- DM1 with cancer

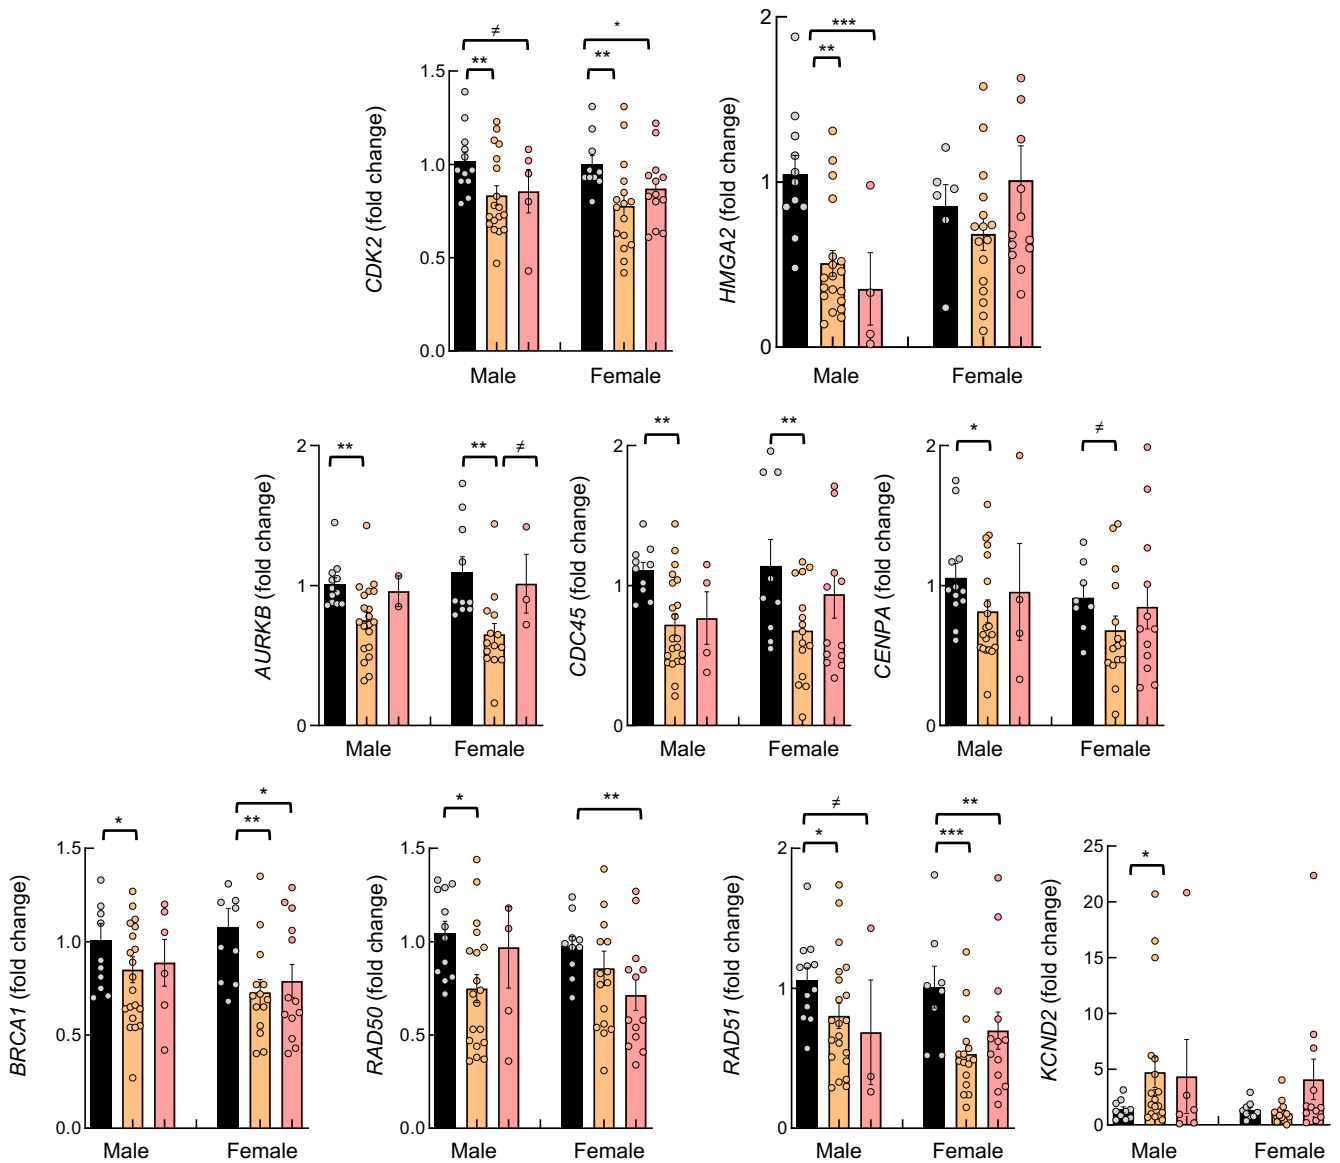

**Figure 2. Genes involved in cell cycle, cell division, cell replication and DDR are diminished in PBMCs of DM1 individuals.**  
**A)** Measurement of mRNA levels of indicated genes by qPCR in PBMCs derived from DM1 patients (n≥56) and controls (n≥22). Both groups were divided by gender (DM1 male (n=27) and female (n=29) and controls male (n=12) and female (n=10) and, in the case of DM1, by the development of cancer (red; male (n=6) and female (n=13)) or not (orange; male (n=21) and female (n=16)).

**A**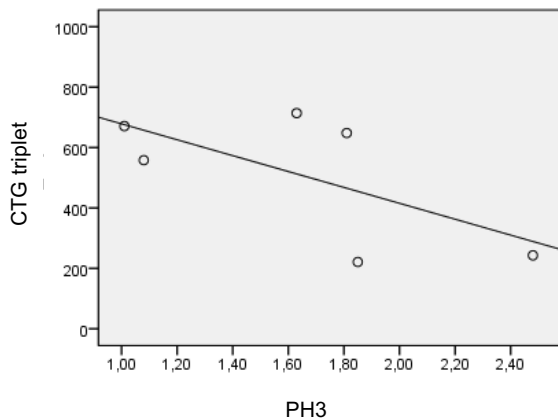

Correlation coefficient = -0.657  
P value = 0.15

**B**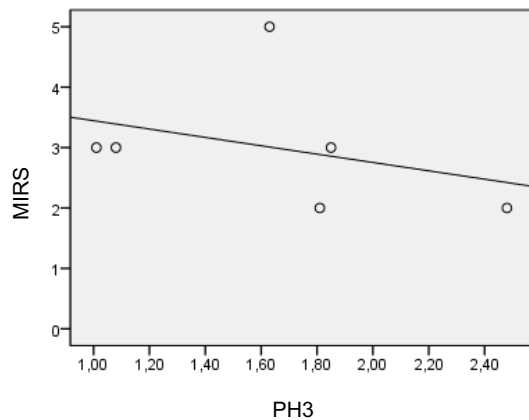

Correlation coefficient = -0.625  
P value = 0.28

**C**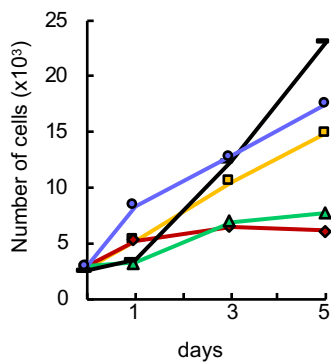

■ C1, age 49, male  
 ◆ C2, age 48, female  
 ▲ C3, age 27, male  
 — C4, age 29, male  
 ● C5, age 46, male

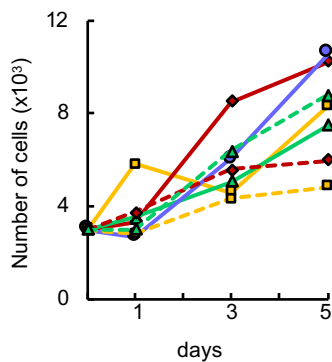

■ DM1-1, age 71, male, MIRS 3, CTG 167  
 ◆ DM1-2, age 50, male, MIRS 3, CTG 233  
 ▲ DM1-3, age 56, male, MIRS 3, CTG 333  
 ● DM1-4, age 45, female, MIRS 2, CTG 333  
 ■ DM1-5, age 44, female, MIRS 2, CTG 833  
 ◆ DM1-6, age 56, male, MIRS 3, CTG 1333  
 ▲ DM1-7, age 34, female, MIRS 4, CTG 1650

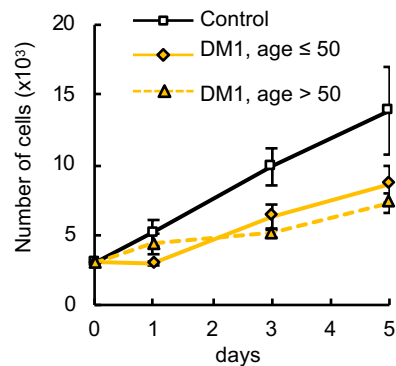

**Figure 3. Correlation of proliferation with clinical characteristics.**

**A)** Correlation analysis of phospho-Histone H3 numbers in DM1 derived fibroblasts and CTG triplet expansion. **B)** Correlation analysis of phospho-Histone H3 numbers in DM1 derived fibroblasts and MIRS scale. **C)** Cellular growth in control and DM1 fibroblasts stratified by donor age. Proliferation does not seem to be associated to age of individuals.

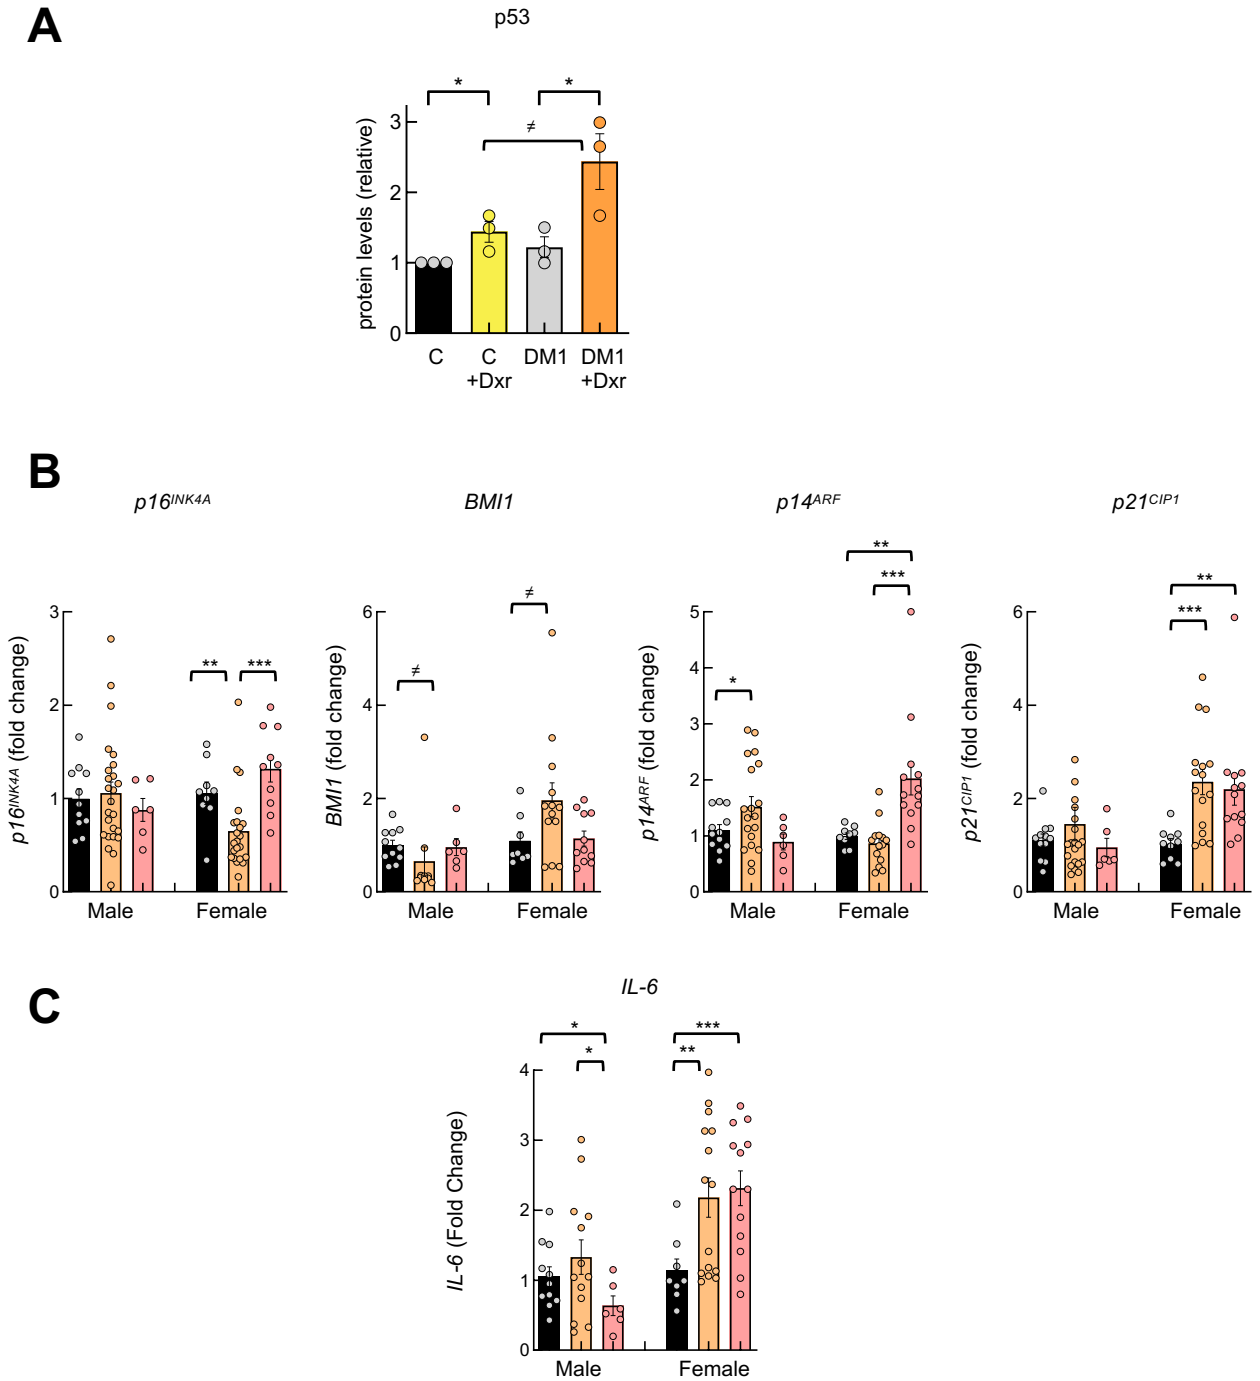

**Figure 4. Expression of senescence markers p53, CDKIs and IL6 is altered in samples of DM1 individuals.**

**A)** Quantification of p53 expression in controls and DM1 fibroblasts in the absence or presence of doxorubicin (n=3). Difference # is =0.07. **B,C)** Measurement of mRNA levels of indicated genes by qPCR in PBMCs derived from DM1 patients (n≥56) and controls (n≥22). Both groups were divided by gender (DM1 male (n=27) and female (n=29) and controls male (n=12) and female (n=10) and, in the case of DM1, by the development of cancer (red; male (n=6) and female (n=13)) or not (orange; male (n=21) and female (n=16)).

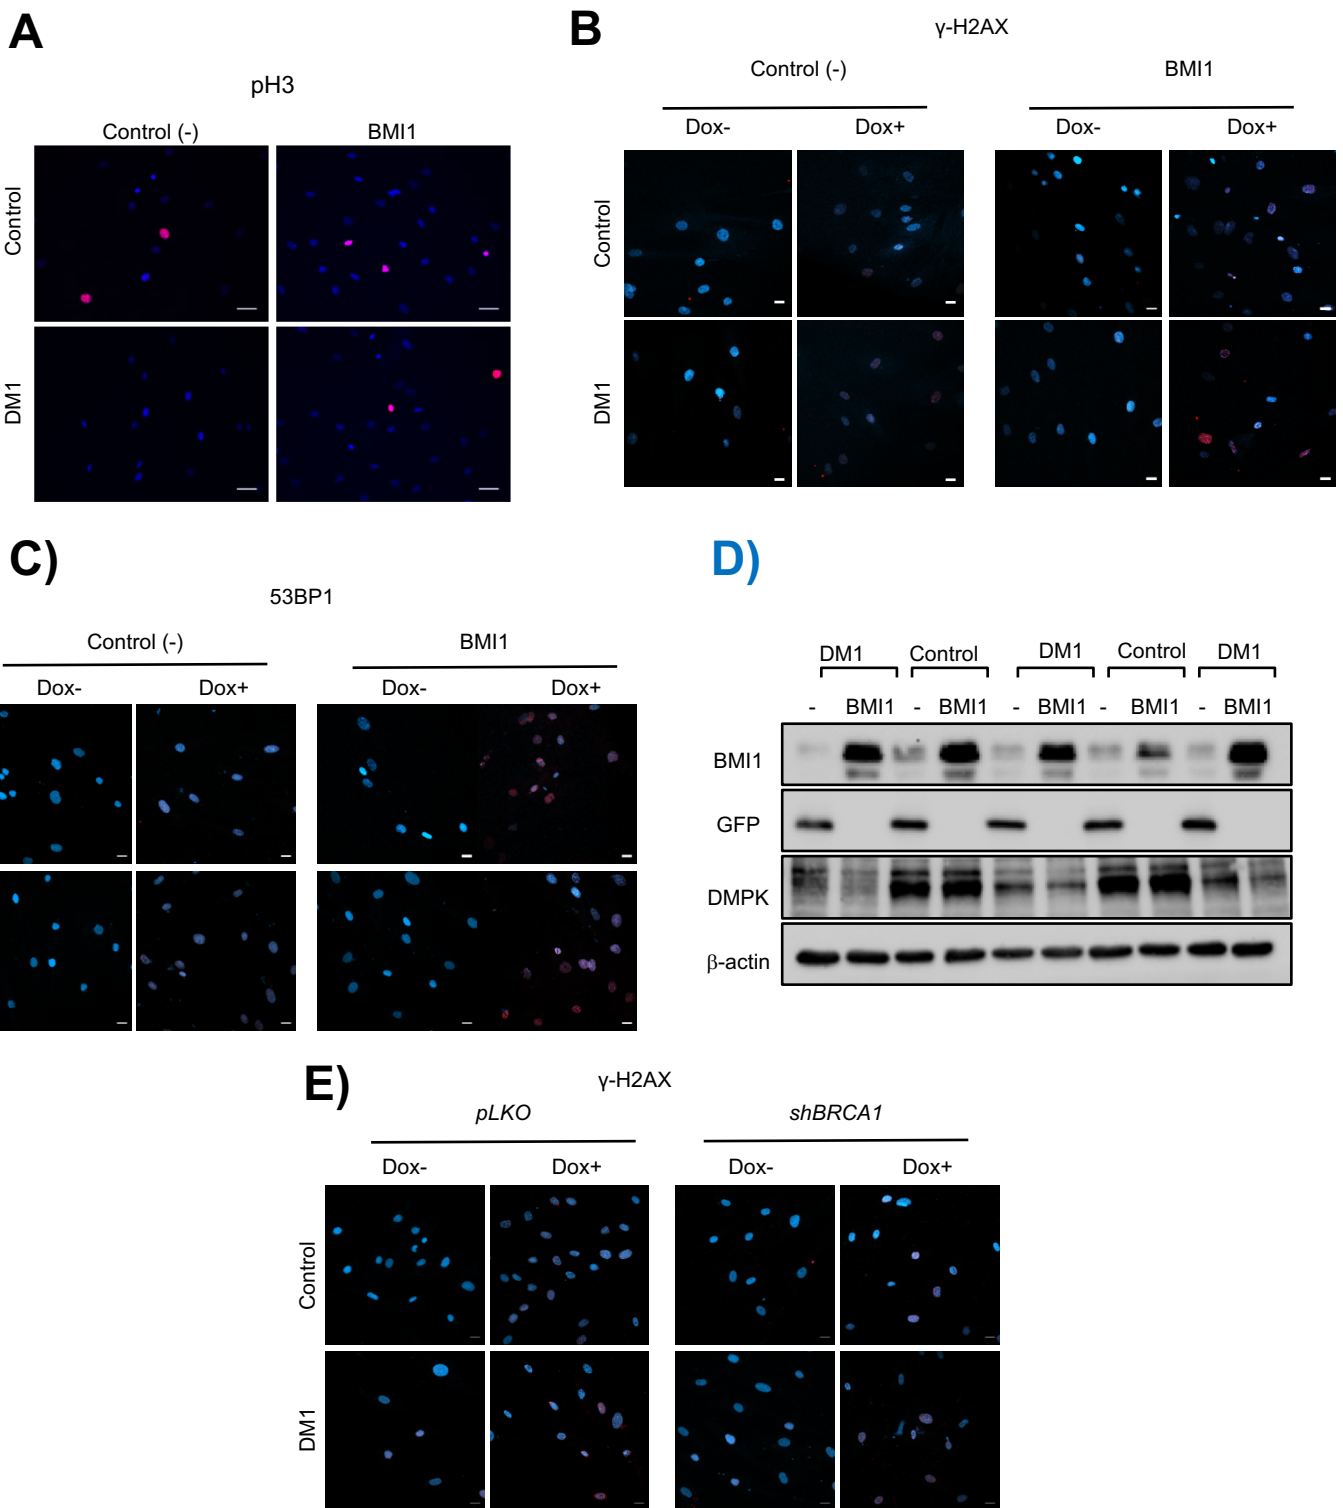

**Figure 5. BMI1 and DDR play a role in DM1 cellular phenotypes.**

**A)** Representative image of phospho-Histone H3 (pH3) positive cells in controls and DM1 fibroblasts infected with empty vector with GFP (-) or a plasmid encoding *BMI1* (BMI1). **B)** Representative image of  $\gamma$ -H2AX in controls and DM1 fibroblasts infected with empty vector (-) or *BMI1* in the absence (Dox-) or presence of doxorubicin (Dox+). **C)** Representative image of 53BP1 detection in controls and DM1 fibroblasts infected with empty vector (-) or a plasmid encoding *BMI1* in the absence (Dox-) or presence of doxorubicin (Dox+). **D)** Western Blot of indicated proteins in control and DM1 cells infected with empty vector (-) or *BMI1*. **E)** Representative image of  $\gamma$ -H2AX-positive cells in controls and DM1 fibroblasts infected with empty vector (*pLKO*) or a short hairpin of *BRCA1* (*shBRCA1*) in the absence (Dox-) or presence of doxorubicin (Dox+). Scale bar: 50  $\mu$ m

**A**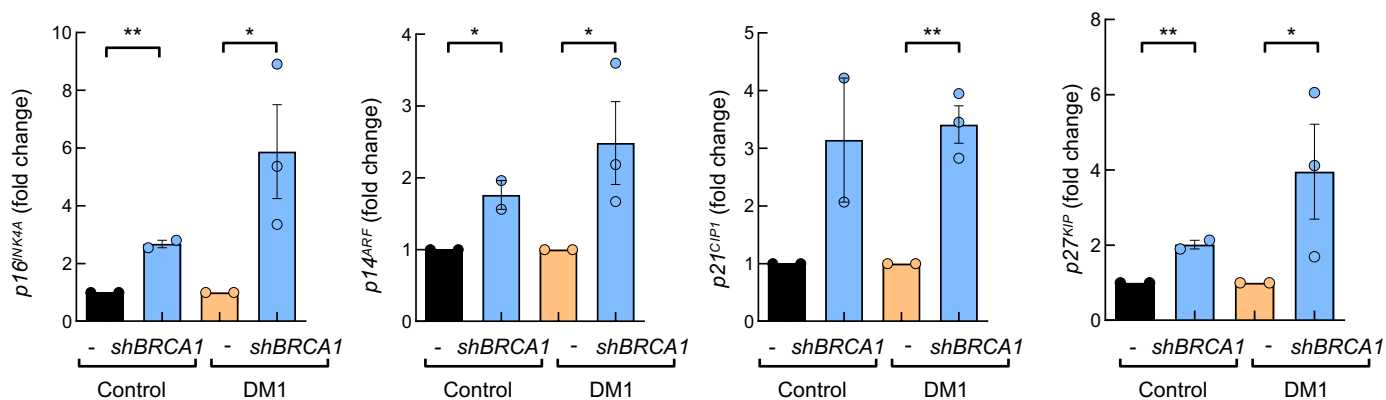**B**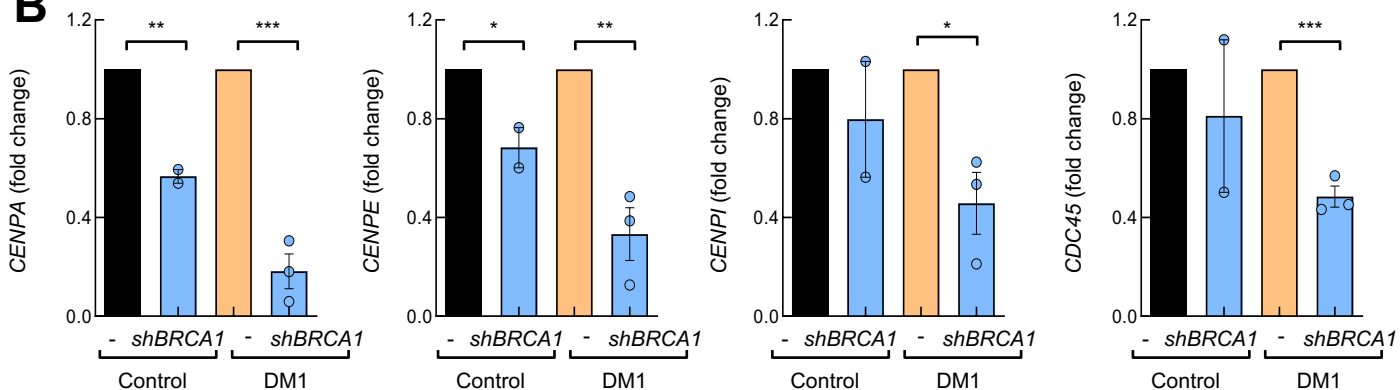**C**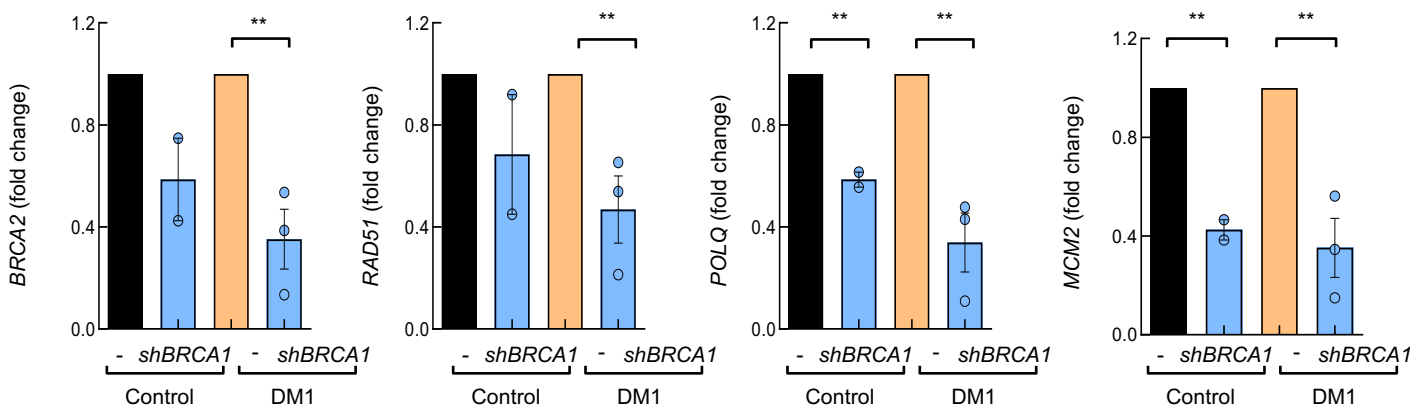**Figure 6. BRCA1 regulates the expression of relevant genes involved in cell cycle, cell division and DDR.**

**A-C)** mRNA levels of genes involved in cell cycle, cell division and replication and DDR in DM1 and control fibroblasts of the indicated genotypes (n≥2).

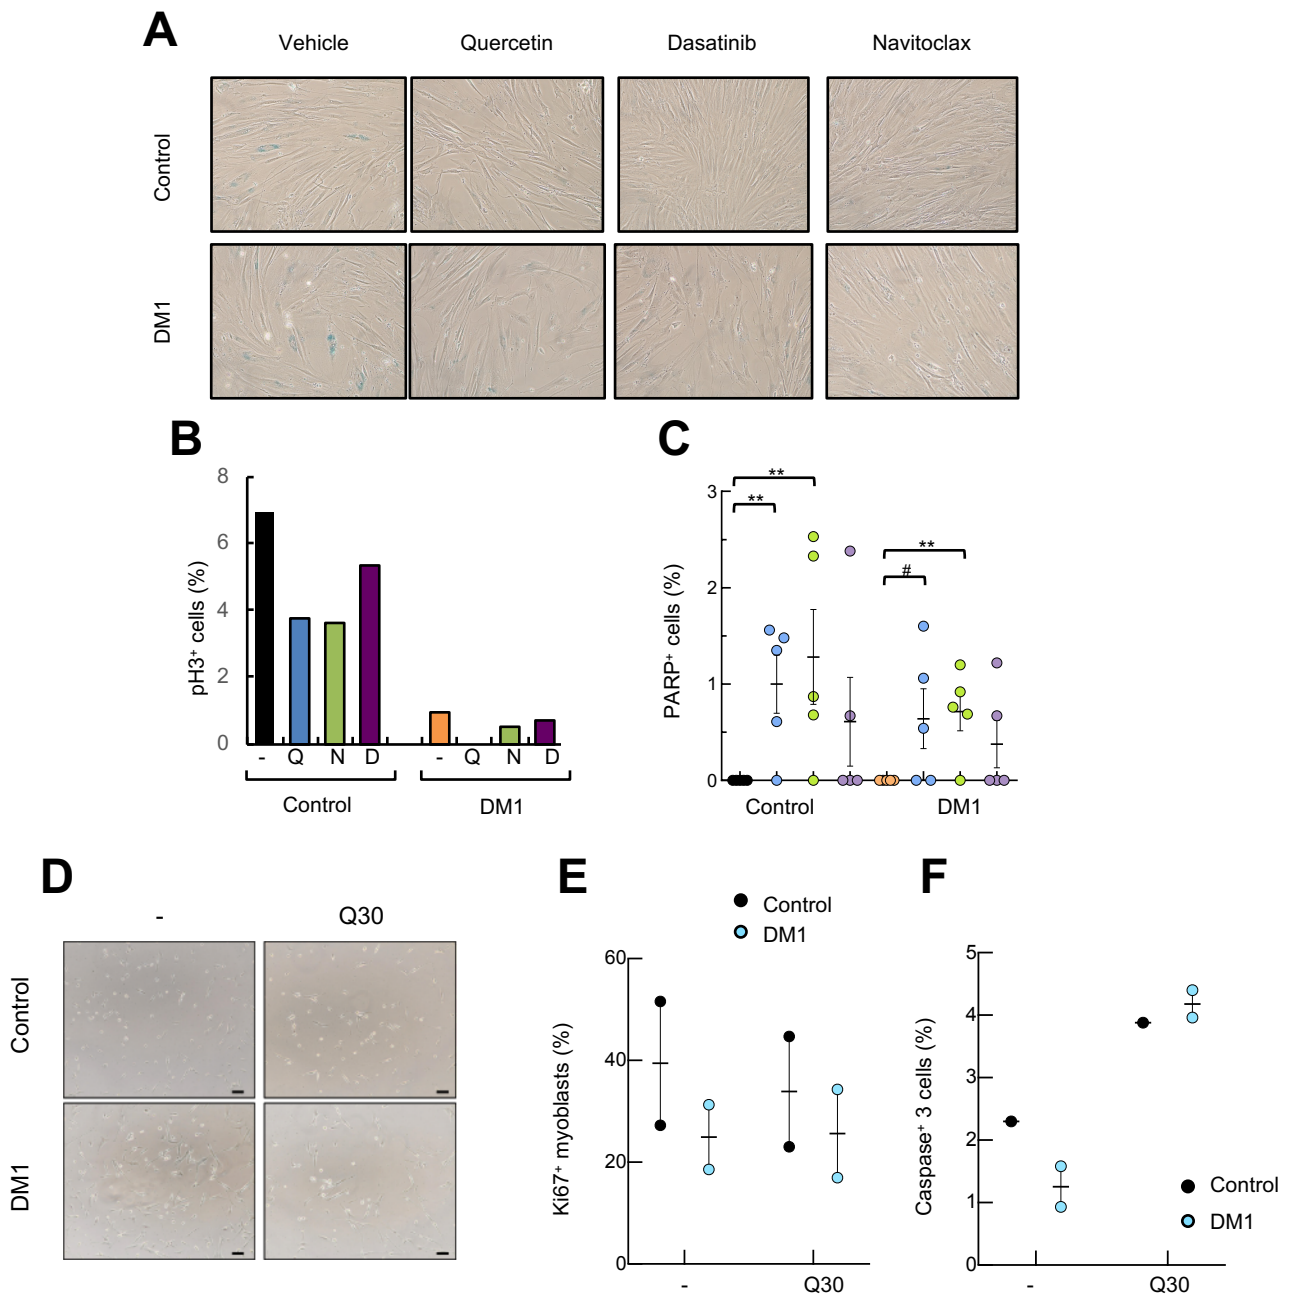

**Figure 7. Senotherapy kills senescent cells in DM1 cells.**

Representative images of SA  $\beta$ -galactosidase in control and DM1 fibroblasts at late passage in the absence or treated with 15 mM Quercetin, 0.5 nM Dasatinib or 10 mM Navitoclax for 3 days. **B)** Quantification of pH3 positive cells in fibroblasts in the absence or treated with 15 mM Quercetin, 0.5 nM Dasatinib or 10 mM Navitoclax at late passage. **C)** Quantification of PARP positive cells in fibroblasts at early passage in the absence or treated with 15 mM Quercetin, 0.5 nM Dasatinib or 10 mM Navitoclax. **D)** Representative images of SA  $\beta$ -galactosidase in myoblasts at early passage (3-5) in the absence or treated with 30 mM Quercetin. DM1 myoblasts present few SA  $\beta$ -galactosidase, which are not detected with Quercetin treatment. scale bar is 100  $\mu$ m. **E)** Quantification of Ki67 positive cells in myoblasts at early passage (3-5) in the absence or treated with 30 mM Quercetin for 3 days. **F)** Quantification of Caspase 3 positive cells in myoblasts at early passage in the absence or treated with 30 mM Quercetin for 3 days.

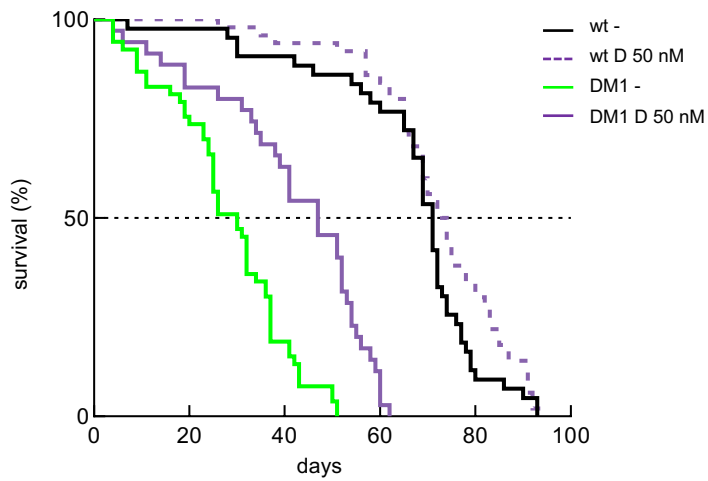

**Figure 8. Dasatinib significantly extends longevity in *REC2 Drosophila DM1* model *in vivo*.** Survival curve of non-treated control (n=45) and DM1 flies (n=53) or in presence of 50nM Dasatinib (Control, n=48 and DM1, n=36). Median survival in days is 73 vs non-defined in controls (*non-treated vs Dasatinib*,  $p>0.05$ ) and 30 vs 47 in DM1 flies (*non-treated vs Dasatinib*,  $p<0.0001$ )



**Supplemental table 1. Clinical characteristics of the individuals from whom fibroblasts were isolated and used in this study.** Myoblasts were isolated from patient DM1-2 and DM1-7

| Fibroblast Cell Line | Status  | Gender | MIRS | CTG (n) in blood | Age at diagnosis (years) | CTG (n) in fibroblast (early passage) | CTG (n) in fibroblast (late passage) | Age at biopsy (years) |
|----------------------|---------|--------|------|------------------|--------------------------|---------------------------------------|--------------------------------------|-----------------------|
| C1                   | Control | M      |      |                  |                          |                                       |                                      | 49                    |
| C2                   | Control | F      |      |                  |                          |                                       |                                      | 48                    |
| C3                   | Control | M      |      |                  |                          |                                       |                                      | 27                    |
| C4                   | Control | M      |      |                  |                          |                                       |                                      | 29                    |
| C5                   | Control | M      |      |                  |                          |                                       |                                      | 46                    |
| C6                   | Control | ?      |      |                  |                          |                                       |                                      | 52                    |
| DM1-1                | DM1     | M      | 3    | 167              | 53                       | 221                                   | 304                                  | 71                    |
| DM1-2                | DM1     | M      | 5    | 233              | 20                       | 714                                   | 463                                  | 50                    |
| DM1-3                | DM1     | M      | 3    | 333              | 33                       | 671                                   | 1287                                 | 56                    |
| DM1-4                | DM1     | F      | 2    | 333              | 41                       | 243                                   | 1425                                 | 45                    |
| DM1-5                | DM1     | F      | 2    | 833              | 27                       | 648                                   | 802                                  | 44                    |
| DM1-6                | DM1     | M      | 3    | 1333             | 20                       | 588                                   | 1378                                 | 56                    |
| DM1-7                | DM1     | F      | 4    | 1650             | 12                       | 750                                   | 866                                  | 34                    |

MIRS (Muscle impairment rating scale)

**Supplemental table 2. Gene Set Enrichment analysis (GSEA) and genes downregulated in DM1 derived fibroblasts.** *p* –value shows significance of the gene set enrichment in DM1 compared to control fibroblasts.

---

| Count   | p-val     | GSEA                                 | Genes                                                                                                                                                                                                                                     |
|---------|-----------|--------------------------------------|-------------------------------------------------------------------------------------------------------------------------------------------------------------------------------------------------------------------------------------------|
| 44/1037 | 5.935e-08 | CELL-CYCLE-PROCESS                   | AURKB BCL2L1 BRCA1 BRCA2 CDC45 CDCA3 CDK2 CDK6 2 DIAPH2 DTL EZR FBXO5 FGF10 FOXM1 GAS2L3 GINS1 GTSE1 HMGA2 KIFC1 MAP2K6 MCM3 MCM4 MCM8 MELK MKI67 NCAPG NCAPG2 NCAPH NEK2 NUF2 PIM2 PRIM1 PRKAR2B PRKCA RPA4 SGOL2 SKA1 SMC1A SPAG5 STMN1 |
| 15/186  | 5.930e-07 | CONDENSED-CHROMOSOME                 | AURKB BRCA1 CDK2 CENPE CENPM CENPW MKI67 NCAPG NCAPH NEK2 NUF2 SGOL2 SKA1 SMC1A SPAG5                                                                                                                                                     |
| 33/749  | 9.992e-07 | MITOTIC-CELL-CYCLE                   | AURKB BCL2L1 CDC45 CDCA3 CDK2 CDK6 CENPE CENPW FBXO5 FGF10 FOXM1 GINS1 GTSE1 HMGA2 KIFC1 MCM3 MCM4 MCM8 MELK NCAPG NCAPG2 NCAPH NEK2 NUF2 PIM2 PRIM1 PRKAR2B PRKCA RPA4 SKA1 SMC1A SPAG5 STMN1                                            |
| 15/204  | 1.903e-06 | DNA-REPLICATION                      | BRCA1 BRCA2 CDC45 CDK2 CHAF1B DTL GINS1 HMGA1 MCM3 MCM4 MCM8 POLQ PRIM1 RFC3 RPA4                                                                                                                                                         |
| 5/17    | 4.036e-06 | REGULATION-OF-PLATELET-AGGREGATION   | ADRB2 LYN PRKCA PRKCD PTGER3                                                                                                                                                                                                              |
| 10/97   | 4.105e-06 | DNA-DEPENDENT-DNA-REPLICATION        | BRCA2 CDC45 GINS1 HMGA1 MCM3 MCM4 POLQ PRIM1 RFC3 RPA4                                                                                                                                                                                    |
| 11/119  | 4.267e-06 | KINETOCHORE                          | AURKB CENPE CENPI CENPM CENPW NEK2 NUF2 SGOL2 SKA1 SMC1A SPAG5                                                                                                                                                                            |
| 13/170  | 5.487e-06 | SISTER-CHROMATID-SEGREGATION         | AURKB CENPE CENPI CENPM KIFC1 NCAPG NCAPH NEK2 NUF2 SGOL2 SKA1 SMC1A SPAG5                                                                                                                                                                |
| 16/253  | 6.399e-06 | CHROMOSOME-SEGREGATION               | AURKB BRCA1 BRCA2 CENPE CENPI CENPM CENPW KIFC1 NCAPG NCAPH NEK2 NUF2 SGOL2 SKA1 SMC1A SPAG5                                                                                                                                              |
| 16/262  | 9.929e-06 | DNA-CONFORMATION-CHANGE              | CDC45 CENPI CENPM CENPW CHAF1B GINS1 HIST1H2BG HIST1H3G HMGA1 HMGA2 HMGB3 MCM3 MCM4 NCAPG NCAPG2 NCAPH                                                                                                                                    |
| 22/448  | 9.939e-06 | CELL-DIVISION                        | AURKB BCL2L1 BRCA2 CDCA3 CDK2 CDK6 CENPE CENPW DIAPH2 FBXO5 HMGA2 KIFC1 NCAPG NCAPG2 NCAPH NEK2 NUF2 SGOL2 SKA1 SMC1A SPAG5 STMN1                                                                                                         |
| 10/107  | 9.953e-06 | CELL-CYCLE-G1-S-PHASE-TRANSITION     | CDC45 CDK2 CDK6 FBXO5 MCM3 MCM4 MCM8 PIM2 PRIM1 RPA4                                                                                                                                                                                      |
| 33/851  | 1.418e-05 | CHROMOSOME                           | AURKB BRCA1 BRCA2 CDC45 CDK2 CENPE CENPI CENPM CENPW CHAF1B DTL GINS1 HIST1H2AE HIST1H2BG HIST1H3G HMGA1 HMGA2 HMGB3 MCM3 MCM4 MKI67 NCAPG NCAPH NEK2 NUF2 POLQ PRIM1 RFC3 RPA4 SGOL2 SKA1 SMC1A SPAG5                                    |
| 5/24    | 2.556e-05 | HISTONE-PHOSPHORYLATION              | AURKB CDK2 HMGA2 PRKCA PRKCD                                                                                                                                                                                                              |
| 17/322  | 3.577e-05 | CHROMOSOMAL-REGION                   | AURKB BRCA2 CDK2 CENPE CENPI CENPM CENPW HIST1H3G MCM3 MCM4 MKI67 NEK2 NUF2 SGOL2 SKA1 SMC1A SPAG5                                                                                                                                        |
| 35/971  | 3.644e-05 | CHROMOSOME-ORGANIZATION              | ATAD2 AURKB BRCA1 BRCA2 CDC45 CDK2 CENPE CENPI CENPM CENPW CHAF1B GINS1 HIST1H2AE HIST1H2BG HIST1H3G HMGA1 HMGA2 HMGB3 KDM5C KIFC1 MCM3 MCM4 NCAPG NCAPG2 NCAPH NEK2 NUF2 PRIM1 PRKCA PRKCD RFC3 SGOL2 SKA1 SMC1A SPAG5                   |
| 47239   | 6.739e-05 | DNA-REPLICATION-INITIATION           | CDC45 MCM3 MCM4 PRIM1 RPA4                                                                                                                                                                                                                |
| 8/87    | 7.646e-05 | MITOTIC-SISTER-CHROMATID-SEGREGATION | AURKB CENPE KIFC1 NCAPG NCAPH NEK2 SMC1A SPAG5                                                                                                                                                                                            |
| 14/250  | 8.358e-05 | CELL-CYCLE-PHASE-TRANSITION          | CDC45 CDK2 CDK6 FBXO5 FOXM1 MCM3 MCM4 MCM8 MELK NEK2 PIM2 PRIM1 PRKAR2B RPA4                                                                                                                                                              |
| 20/466  | 1.491e-04 | ORGANELLE-FISSION                    | AURKB BRCA2 CDCA3 CDK2 CENPE CENPW FBXO5 HMGA2 KIFC1 MKI67 NCAPG NCAPG2 NCAPH NEK2 NUF2 PIM2 SGOL2 SKA1 SMC1A SPAG5                                                                                                                       |
| 11/183  | 2.287e-04 | DNA-PACKAGING                        | CENPI CENPM CENPW CHAF1B HIST1H2BG HIST1H3G HMGA1 HMGA2 NCAPG NCAPG2 NCAPH                                                                                                                                                                |
| 16/351  | 3.121e-04 | MITOTIC-NUCLEAR-DIVISION             | AURKB CDCA3 CDK2 CENPE CENPW FBXO5 HMGA2 KIFC1 NCAPG NCAPG2 NCAPH NEK2 NUF2 SKA1 SMC1A SPAG5                                                                                                                                              |
| 8/109   | 3.694e-04 | SISTER-CHROMATID-COHESION            | AURKB CENPE CENPI CENPM NUF2 SGOL2 SKA1 SMC1A                                                                                                                                                                                             |
| 3/11    | 3.906e-04 | INNER-CELL-MASS-CELL-PROLIFERATION   | BRCA2 GINS1 NCAPG2                                                                                                                                                                                                                        |
| 3/11    | 3.906e-04 | MCM-COMPLEX                          | MCM3 MCM4 MCM8                                                                                                                                                                                                                            |

|        |           |                                                                    |                                                                                                                                                 |
|--------|-----------|--------------------------------------------------------------------|-------------------------------------------------------------------------------------------------------------------------------------------------|
| 15/328 | 4.458e-04 | REGULATION-OF-DNA-METABOLIC-PROCESS                                | ANXA3 AURKB BRCA1 BRCA2 CDK2 FGF10 FOXM1 HMGA2 NEK2 POLQ PRKCD RAD51AP1 RFC3 SMC1A TOM1L1                                                       |
| 3/12   | 5.163e-04 | CELL-CYCLE-DNA-REPLICATION                                         | CDC45 GINS1 RPA4                                                                                                                                |
| 9/143  | 5.424e-04 | REGULATION-OF-RESPONSE-TO-DNA-DAMAGE-STIMULUS                      | BCL2L1 BRCA1 CD74 FGF10 FOXM1 HMGA2 POLQ PRKCD RAD51AP1                                                                                         |
| 11/213 | 8.247e-04 | NEGATIVE-REGULATION-OF-CYTOSKELETON-ORGANIZATION                   | AURKB BRCA1 EZR FBXO5 KIFC1 NEK2 PRKCD SMC1A SPAG5 STMN1 TMOD2                                                                                  |
| 3/14   | 8.394e-04 | ATTACHMENT-OF-SPINDLE-MICROTUBULES-TO-KINETOCHORE                  | AURKB BRCA2 CENPE                                                                                                                               |
| 3/14   | 8.394e-04 | DNA-APURINIC-OR-APYRIMIDINIC-SITE-LYASE-ACTIVITY                   | HMGA1 HMGA2 NEIL3                                                                                                                               |
| 5/49   | 8.574e-04 | REGULATION-OF-GENE-SILENCING                                       | ATAD2 CDC45 CDK2 HIST1H3G HMGA1                                                                                                                 |
| 4/30   | 9.106e-04 | CHROMOSOME-CONDENSATION                                            | HMGA2 NCAPG NCAPG2 NCAPH                                                                                                                        |
| 6/73   | 9.535e-04 | REGULATION-OF-DNA-REPAIR                                           | BRCA1 FGF10 FOXM1 HMGA2 POLQ RAD51AP1                                                                                                           |
| 24/698 | 9.573e-04 | CELLULAR-RESPONSE-TO-DNA-DAMAGE-STIMULUS                           | BCL2L1 BRCA1 BRCA2 CDC45 CDK2 CHAF1B DTL FOXM1 GTSE1 HMGA1 HMGA2 LYN MAP2K6 MCM8 NEIL3 NFATC2 POLQ RAD51AP1 RFC3 RPA4 SMC1A TNFRSF1B UBE2T VAV3 |
| 16/392 | 1.020e-03 | POSITIVE-REGULATION-OF-LOCOMOTION                                  | ANXA3 CD274 CD74 CXCL5 DOCK5 ENPP2 FGF10 GTSE1 LYN PODXL PRKCA PTGER3 RRAS2 SEMA7A SRPX2 WNT5B                                                  |
| 4/31   | 1.035e-03 | CELLULAR-SENESCENCE                                                | HMGA1 HMGA2 PRKCD TBX3                                                                                                                          |
| 3/15   | 1.040e-03 | FEMALE-GENITALIA-DEVELOPMENT                                       | AXL FGF10 TBX3                                                                                                                                  |
| 3/15   | 1.040e-03 | DNA-DAMAGE-RESPONSE-SIGNAL-TRANSDUCTION-RESULTING-IN-TRANSCRIPTION | BRCA1 BRCA2 FOXM1                                                                                                                               |
| 6/75   | 1.100e-03 | RECOMBINATIONAL-REPAIR                                             | BRCA1 BRCA2 CDC45 MCM8 POLQ RAD51AP1                                                                                                            |

**Supplemental table 3. Gene Set Enrichment analysis (GSEA) and genes upregulated in DM1 derived fibroblasts.** *p*-value shows significance of the gene set enrichment in DM1 compared to control fibroblasts.

| Count  | p-val     | GSEA                                                | Genes                                             |
|--------|-----------|-----------------------------------------------------|---------------------------------------------------|
| 4/84   | 1.476e-05 | COLLAGEN-TRIMER                                     | COL14A1 COLEC12 CTHRC1 SCARA3                     |
| 4/107  | 3.838e-05 | POTASSIUM-CHANNEL-ACTIVITY                          | ABCC9 KCNA4 KCND2 KCNE4                           |
| 2/10   | 9.204e-05 | CARDIAC-LEFT-VENTRICLE-MORPHOGENESIS                | CPE SFRP2                                         |
| 3/80   | 3.164e-04 | VOLTAGE-GATED-POTASSIUM-CHANNEL-ACTIVITY            | KCNA4 KCND2 KCNE4                                 |
| 3/83   | 3.528e-04 | POTASSIUM-CHANNEL-COMPLEX                           | ABCC9 KCNA4 KCND2                                 |
| 5/394  | 7.756e-04 | EXTRACELLULAR-MATRIX                                | COL14A1 CTHRC1 EFEMP1 MFAP5 SFRP2                 |
| 2/30   | 8.777e-04 | WNT-PROTEIN-BINDING                                 | CTHRC1 SFRP2                                      |
| 3/119  | 1.013e-03 | EXTRACELLULAR-MATRIX-COMPONENT                      | COL14A1 EFEMP1 MFAP5                              |
| 2/34   | 1.129e-03 | DELAYED-RECTIFIER-POTASSIUM-CHANNEL-ACTIVITY        | KCNA4 KCND2                                       |
| 2/37   | 1.337e-03 | COLLAGEN-FIBRIL-ORGANIZATION                        | COL14A1 SFRP2                                     |
| 2/42   | 1.723e-03 | SCAVENGER-RECEPTOR-ACTIVITY                         | COLEC12 SCARA3                                    |
| 4/325  | 2.594e-03 | PROTEINACEOUS-EXTRACELLULAR-MATRIX                  | COL14A1 CTHRC1 EFEMP1 MFAP5                       |
| 2/52   | 2.635e-03 | EPIDERMAL-GROWTH-FACTOR-RECEPTOR-SIGNALING-PATHWAY  | CBL EFEMP1                                        |
| 2/72   | 5.009e-03 | EXTRACELLULAR-MATRIX-STRUCTURAL-CONSTITUENT         | COL14A1 MFAP5                                     |
| 2/78   | 5.860e-03 | REGULATION-OF-JUN-KINASE-ACTIVITY                   | SFRP2 TNFRSF11A                                   |
| 3/228  | 6.438e-03 | SENSORY-ORGAN-MORPHOGENESIS                         | CTHRC1 EFEMP1 NR4A3                               |
| 2/83   | 6.617e-03 | PLASMA-MEMBRANE-RAFT                                | CBL KCND2                                         |
| 3/233  | 6.837e-03 | PROTEIN-HOMOLOGOMERIZATION                          | COLEC12 KCNA4 KCND2                               |
| 2/88   | 7.417e-03 | INNER-EAR-MORPHOGENESIS                             | CTHRC1 NR4A3                                      |
| 7/1227 | 8.881e-03 | RECEPTOR-ACTIVITY                                   | ABCC9 COLEC12 EFEMP1 NR4A3 SCARA3 SFRP2 TNFRSF11A |
| 4/470  | 9.528e-03 | PLASMA-MEMBRANE-PROTEIN-COMPLEX                     | ABCC9 CBL KCNA4 KCND2                             |
| 4/477  | 1.002e-02 | INORGANIC-CATION-TRANSMEMBRANE-TRANSPORTER-ACTIVITY | ABCC9 KCNA4 KCND2 KCNE4                           |
| 3/269  | 1.015e-02 | EMBRYONIC-ORGAN-MORPHOGENESIS                       | CTHRC1 EFEMP1 NR4A3                               |
| 2/105  | 1.045e-02 | ION-CHANNEL-BINDING                                 | ABCC9 KCNE4                                       |
| 2/108  | 1.104e-02 | REGULATION-OF-ESTABLISHMENT-OF-PLANAR-POLARITY      | CTHRC1 SFRP2                                      |
| 2/108  | 1.104e-02 | EAR-MORPHOGENESIS                                   | CTHRC1 NR4A3                                      |
| 6/1000 | 1.111e-02 | SIGNALING-RECEPTOR-ACTIVITY                         | ABCC9 COLEC12 EFEMP1 NR4A3 SFRP2 TNFRSF11A        |
| 2/109  | 1.123e-02 | REGULATION-OF-OSTEOBLAST-DIFFERENTIATION            | CTHRC1 SFRP2                                      |

|               |           |                                           |                                                   |
|---------------|-----------|-------------------------------------------|---------------------------------------------------|
| <b>3/281</b>  | 1.143e-02 | GATED-CHANNEL-ACTIVITY                    | KCNA4 KCND2 KCNE4                                 |
| <b>3/286</b>  | 1.199e-02 | EXTRACELLULAR-STRUCTURE-ORGANIZATION      | COL14A1 MFAP5 SFRP2                               |
| <b>3/286</b>  | 1.199e-02 | TRANSPORTER-COMPLEX                       | ABCC9 KCNA4 KCND2                                 |
| <b>4/513</b>  | 1.283e-02 | INORGANIC-ION-TRANSMEMBRANE-TRANSPORT     | ABCC9 KCNA4 KCND2 KCNE4                           |
| <b>5/763</b>  | 1.291e-02 | POSITIVE-REGULATION-OF-CELL-PROLIFERATION | CTHRC1 EFEMP1 NR4A3 SFRP2 TNFRSF11A               |
| <b>4/518</b>  | 1.326e-02 | EMBRYONIC-MORPHOGENESIS                   | CTHRC1 EFEMP1 NR4A3 SFRP2                         |
| <b>7/1328</b> | 1.327e-02 | SIGNAL-TRANSDUCER-ACTIVITY                | ABCC9 CBL COLEC12 EFEMP1 NR4A3 SFRP2 TNFRSF11A    |
| <b>4/520</b>  | 1.343e-02 | METAL-ION-TRANSPORT                       | ABCC9 KCNA4 KCND2 KCNE4                           |
| <b>2/126</b>  | 1.485e-02 | TUBE-FORMATION                            | CTHRC1 SFRP2                                      |
| <b>8/1674</b> | 1.537e-02 | REGULATION-OF-TRANSPORT                   | CBL KCNA4 KCND2 KCNE4 NR4A3 SFRP2 SYT14 TNFRSF11A |
| <b>3/314</b>  | 1.541e-02 | TUBE-MORPHOGENESIS                        | CTHRC1 NR4A3 SFRP2                                |
| <b>2/131</b>  | 1.600e-02 | CIRCADIAN-RHYTHM                          | KCND2 TNFRSF11A                                   |

**Supplemental table 4. Clinical characteristics of the individuals from whom PBMCs were isolated and used in this study.**

| <b>Code controls</b> | <b>Gender</b> | <b>Age at blood collection</b> |
|----------------------|---------------|--------------------------------|
| F-1                  | Female        | 40                             |
| F-2                  | Female        | 42                             |
| F-3                  | Female        | 38                             |
| F-4                  | Female        | 44                             |
| F-5                  | Female        | 59                             |
| F-6                  | Female        | 43                             |
| F-7                  | Female        | 51                             |
| F-8                  | Female        | 57                             |
| F-9                  | Female        | 55                             |
| F-10                 | Female        | 44                             |
| M-1                  | Male          | 40                             |
| M-2                  | Male          | 53                             |
| M-3                  | Male          | 42                             |
| M-4                  | Male          | 45                             |
| M-5                  | Male          | 43                             |
| M-6                  | Male          | 42                             |
| M-7                  | Male          | 53                             |
| M-8                  | Male          | 41                             |
| M-9                  | Male          | 46                             |
| M-10                 | Male          | 31                             |
| M-11                 | Male          | 34                             |
| M-12                 | Male          | 54                             |

| Code DM1 | Gender | Age at blood collection | CTG  | MIRS |
|----------|--------|-------------------------|------|------|
| DM1-F-1  | Female | 46                      | 667  | 3    |
| DM1-F-2  | Female | 47                      | 1167 | 3    |
| DM1-F-3  | Female | 35                      | 1167 | 4    |
| DM1-F-4  | Female | 53                      | 1667 |      |
| DM1-F-5  | Female | 41                      | 667  | 3    |
| DM1-F-6  | Female | 31                      | 500  | 2    |
| DM1-F-7  | Female | 37                      | 1333 | 3    |
| DM1-F-8  | Female | 18                      | 667  | 1    |
| DM1-F-9  | Female | 36                      | 1000 | 3    |
| DM1-F-10 | Female | 44                      | 1000 | 4    |
| DM1-F-11 | Female | 56                      | 667  | 4    |
| DM1-F-12 | Female | 29                      | 467  | 2    |
| DM1-F-13 | Female | 50                      | 600  | 3    |
| DM1-F-14 | Female | 37                      | 1400 | 3    |
| DM1-F-15 | Female | 45                      | 667  | 3    |
| DM1-F-16 | Female | 32                      | 500  |      |
| DM1-M-1  | Male   | 27                      | 500  |      |
| DM1-M-2  | Male   | 31                      | 333  | 2    |
| DM1-M-3  | Male   | 26                      | 1000 |      |
| DM1-M-4  | Male   | 24                      | 467  | 3    |
| DM1-M-5  | Male   | 51                      | 1333 | 4    |
| DM1-M-6  | Male   | 35                      | 1000 | 3    |
| DM1-M-7  | Male   | 50                      | 667  | 3    |
| DM1-M-8  | Male   | 39                      | 1333 | 4    |
| DM1-M-9  | Male   | 37                      | 1000 | 2    |
| DM1-M-10 | Male   | 37                      | 1000 |      |
| DM1-M-11 | Male   | 36                      | 400  | 3    |
| DM1-M-12 | Male   | 35                      | 667  | 3    |
| DM1-M-13 | Male   | 37                      | 1000 | 2    |

|          |      |    |      |   |
|----------|------|----|------|---|
| DM1-M-14 | Male | 58 | 833  | 3 |
| DM1-M-15 | Male | 56 | 1000 | 3 |
| DM1-M-16 | Male | 49 | 667  |   |
| DM1-M-17 | Male | 53 | 800  | 4 |
| DM1-M-18 | Male | 42 | 667  | 4 |
| DM1-M-19 | Male | 41 | 500  | 3 |
| DM1-M-20 | Male | 37 | 1000 | 3 |
| DM1-M-21 | Male | 34 | 667  | 3 |

| Code DM1 Cancer | Gender | Age at blood collection | CTG  | MIRS | Age of cancer diagnosis |
|-----------------|--------|-------------------------|------|------|-------------------------|
| DM1-F-C1        | Female | 65                      | 1500 | 4    | 52                      |
| DM1-F-C2        | Female | 42                      | 833  | 3    | 43                      |
| DM1-F-C3        | Female | 39                      | 833  |      |                         |
| DM1-F-C4        | Female | 61                      | 1167 | 4    | 39                      |
| DM1-F-C5        | Female | 41                      | 1000 | 4    | 35                      |
| DM1-F-C6        | Female | 38                      | 1000 | 4    | 37                      |
| DM1-F-C7        | Female | 41                      | 500  | 4    | 38                      |
| DM1-F-C8        | Female | 65                      | 333  | 4    | 65                      |
| DM1-F-C9        | Female | 51                      | 1500 | 4    | 41 and 51               |
| DM1-F-C11       | Female | 34                      | 1650 | 4    | 17                      |
| DM1-F-C12       | Female | 48                      | 1333 | 3    | 45                      |
| DM1-F-C13       | Female | 48                      | 1333 | 2    | 43 and 47               |
| DM1-M-C1        | Male   | 48                      | 333  | 3    | 31                      |
| DM1-M-C2        | Male   | 52                      | 1000 | 3    | 49                      |
| DM1-M-C3        | Male   | 56                      | 333  | 3    | 52                      |
| DM1-M-C4        | Male   | 57                      | 1333 | 3    | 50                      |
| DM1-M-C5        | Male   | 55                      | 267  |      |                         |
| DM1-M-C6        | Male   | 54                      | 333  | 4    | 51                      |



**Supplemental Table 5: List of primers used in the manuscript.**

| HUMAN     |                             |                             |
|-----------|-----------------------------|-----------------------------|
| Gene      | Forward Sequence (5' to 3') | Reverse Sequence (5' to 3') |
| GAPDH     | ATGGGGAAGGTGAAGGTCCG        | GACGGTGCCATGGAATTTGC        |
| DMPK      | GGCCAGGTGTATGCCATGAA        | CCGCCCACGTAATACTCCA         |
| MBNL1     | GCTGTTAGTGTACACCAATTCCG     | AGGCGATTACTCGTCCATTTTC      |
| SIX5      | GCTGCCTTCGGCCACT            | GCCACACCCGTCACGAT           |
| MBNL2 Ex7 | ACAAGTGACAACACCGTAACCG      | TTTGGTAAAGGATGAAGAGCACC     |
|           |                             |                             |
| CDK2      | GTACCTCCCCTGGATGAAGAT       | CGAAATCCGCTTGTTAGGGTC       |
| HMGA2     | ACCCAGGGGAAGACCCAAA         | CCTCTTGCCGTTTTTCTCCA        |
|           |                             |                             |
| CENPA     | CCGCCTGGCAAGAGAAATATG       | GCCAGTTGCACATCCTTTGG        |
| CENPE     | GAAGTCAACAGGCCCAAGATAC      | CACCTCCACAAGTTAAGGGTTT      |
| CENPI     | ACACGGATATTGAAGTGCATGAT     | TACCTTGGTGCTACCAGAACA       |
| CDC45     | GTGATTTGGCGGGAGTCTTG        | CGAAGAGAAGGACCCCTCTGG       |
| MCM2      | ATCTACGCCAAGGAGAGGGT        | GCTGCCTGTCGCCATAGATT        |
| GIN51     | TGTATGACCGCTTGCTTCGG        | GCAGCCATGTGAAATCGTAATG      |
| AURKB     | CATGAGCCGCTCCAATGTC         | TGCTATTCTCCATCACCTTCTGG     |
|           |                             |                             |
| BRCA1     | CAGAAGAAAGGGCCTTCACA        | TGTGTCAAGCTGAAAAGCACA       |
| BRCA2     | CACCTCTGGAGCGGACTTAT        | ATCTGCTTTGTTGCAGCGTG        |
| RAD50     | AGGAAAGGCTTTGAAGCAAAA       | GTCTGACGTACCTGCCGAAG        |
| RAD51     | AGCTCAAGTGGATGGAGCAG        | TTCTGGTTTCCCCTTCTCT         |
| RAD51AP   | ATGACAAGCTCTACCAGAGAGAC     | CACATTAGTGGTGACTGTTGGAA     |
| FANCA     | TGTGGCATCTTACGTACAAGG       | CCTGAAGAGCCACGATCCC         |
| POLQ      | ACTTTTGCTGACCAAGATTTGCT     | ACTCATGCCAACGATTTGCAC       |
|           |                             |                             |
| ABCC9     | TTACATTCGCTCTCCTGTTTGTG     | GGTGGAGGTGCCTTGATTCC        |
| KCND2     | GGGTTTTTCATTGCCGTCTCT       | CACAGCATAACCGCTCTCCA        |
| SFRP2     | CTGGCCCGACATGCTTGAG         | GCTTCACATACCTTTGGAGCTT      |
|           |                             |                             |
| p16INK4a  | GGGGGCACCAGAGGCAGT          | GGTTGTGGCGGGGGCAGTT         |
| p14ARF    | CCCTCGTGCTGATGCTACTG        | CATCATGACCTGGTCTTCTAGGAA    |
| p27KIP1   | GCAACCGACGATTCTTCTAC        | CTTCTGAGGCCAGGCTTCTT        |
| p21CIP1   | GACACCACTGGAGGGTGACT        | CAGGTCCACATGGTCTTCTCT       |
| BMI1      | GGAGACCAGCAAGTATTGCTCTATT   | CATTGCTGCTGCTGGGCATCGTAAG   |

|         |                             |                             |
|---------|-----------------------------|-----------------------------|
|         |                             |                             |
| IL6     | CCAGGAGCCCAGCTATGAAC        | CCCAGGGAGAAGGCAACTG         |
| TNFA    | CCCAGGCAGTCAGATCATCTTC      | AGCTGCCCCCTCAGCTTGA         |
| CCL5    | CTCGCTGTCTCATCTCATTGCT      | TGTGGTGTCCGAGGAATATGG       |
|         |                             |                             |
| CASP5   | TTCAACACCACATAACGTGTCC      | GTC AAGGTTGCTCGTTCTATGG     |
|         |                             |                             |
| MOUSE   |                             |                             |
| Gene    | Forward Sequence (5' to 3') | Reverse Sequence (5' to 3') |
| Actin   | GGCACCACACCTTCTACAATG       | GTGGTGGTGAAGCTGTAGCC        |
| Cdk2    | CCTGCTTATCAATGCAGAGGG       | GTGCTGGGTACACACTAGGTG       |
| Hmga2   | AGACCCAGAGGAAGACCCAAAG      | TTCAGTCTCCTGAGCAGGCTTC      |
|         |                             |                             |
| Cenpa   | CTCCAGTGTAGGCTCTCAGAC       | CTGAAAGGCTTCTTCCTGAACA      |
| Cenpe   | CTCCGCCATACAAGGCTACAA       | CCCTGGGTATAACTCCCAAACAA     |
| Cenpi   | AGGGTTACTAGAACTCCCAGC       | GCGTGTAGAATCTTCCACTGAA      |
| Cdc45   | TAGTGGAGCGAAACAGGAAGA       | GGCCGACGATGTCCATAAT         |
| Mcm2    | TATGACGGCTCGTTAACACC        | TTCATGCCCATAGATGGAGGG       |
| Gins1   | ATGTTCTGCGAAAAAGCTATGGA     | TCACATCAGACTGGTTTTGTTC A    |
| AurkB   | CAACTTTGAGATTGGGCGTCC       | GGCGAAGCTGGTGTCTCTAC        |
|         |                             |                             |
| Brca1   | CTGCCGTCCAAATTCAAGAAGT      | CTTGTGCTTCCCTGTAGGCT        |
| Brca2   | TGGTAGATGTTGCTAGTCCGC       | ACCACTGGCTTTTCTCGTTGT       |
| Rad50   |                             |                             |
| Rad51   | AAGTTTTGGTCCACAGCCTATTT     | CGGTGCATAAGCAACAGCC         |
| Fanca   | AGAGCAGATAAGATTCCTCCTC      | GGGTCGGGTCTGTCATTAAG        |
| PoiQ    | CAAGGTTTCATTGGGTCTTGG       | CGAGCAGGAAGATTCACCTCAG      |
|         |                             |                             |
| Kcnd2   | TCAGGACGCTCTGATAGTGCT       | TCTGGGTATCGTTCCAGGGTG       |
|         |                             |                             |
| Ki-67   | ATCATTGACCGCTCCTTTAGGT      | GCTCGCCTTGATGGTTCCT         |
| p16Ink4 | CCCAACGCCCCGAACT            | GCAGAAGAGCTGCTACGTGAA       |
| p19Arf  | GCCGCACCGGAATCCT            | TTGAGCAGAAGAGCTGCTACGT      |
| p27Kip1 | ATTGGGTCTCAGGCAAATCT        | GTTCTGTTGGCCCTTTTGT         |
| p21Cip1 | GTGGGTCTGACTCCAGCCC         | CCTTCTCGTGAGACGCTTAC        |
| Bmi1    | ACGTCATGTATGAAGAGGAACCT     | TGGCCGAACCTGTATTTCAAAG      |
|         |                             |                             |
|         |                             |                             |

| FLY    |                             |                             |
|--------|-----------------------------|-----------------------------|
| Gene   | Forward Sequence (5' to 3') | Reverse Sequence (5' to 3') |
| Rp49   | ATCGGTTACGGATCGAACAA        | GACAATCTCCTTGCGCTTCT        |
| Mbl    | TTGAATCAAAATTATAGCCCAAGCT   | CGATTTTGCTCGTTAGCGTTT       |
| Cid    | ACAACTCAAAGTCGCCGAAC        | CGATTGTTGTCCTGAAGCGT        |
| Cana   | CTGCAACAGTTCACCAAGCT        | GCTTTGATCCTGTTCCGGCAT       |
| String | GAAAACAACATGCAGCATGGAT      | CGACAGCTCCTCCTGGTC          |
| Dacapo | GTCAGCTTCCAGGAGTCGAG        | CCAAAGTTCTCCCGTTCTGA        |
| Psc    | CCAAGCAGAACAGTGCACC         | GCTCGACGATTTGGGACTTC        |
|        |                             |                             |
